# Supplementary material for: MnCo2O4and CoMn2O4octahedral nanocrystals synthesized via a one-step co-precipitation process and their catalytic properties in benzyl alcohol oxidation
Source: Royal Society of Chemistry journal article supplement (doi:10.1039/c6ce01905f), 2016-01-01
Supplement: c6ce01905f1.pdf [file c6ce01905f1.pdf]

## Electronic Supplementary Information

### **MnCo<sub>2</sub>O<sub>4</sub> and CoMn<sub>2</sub>O<sub>4</sub> octahedral nanocrystals synthesized via a one-step co-precipitation process and their catalytic properties in benzyl alcohol oxidation**

Lili Yao,<sup>ab</sup> Linlin Zhang,<sup>ab</sup> Yongxin Liu,<sup>c</sup> Long Tian,<sup>a</sup> Jin Xu,<sup>a</sup> Ting Liu,<sup>ab</sup> Dan Liu<sup>d</sup> and Cheng Wang<sup>□d</sup>

<sup>a</sup> State Key Laboratory of Rare Earth Resource Utilization, Changchun Institute of Applied Chemistry, Chinese Academy of Sciences, 5625 Renmin Street, Changchun, Jilin 130022, P. R. China

<sup>b</sup> University of Chinese Academy of Sciences, Beijing 100049, P. R. China

<sup>c</sup> School of Material Science and Engineering, East China Jiaotong University, Nanchang, Jiangxi 330013, P. R. China

<sup>d</sup> Institute for New-Energy Materials and Low-Carbon Technologies, Tianjin University of Technology, Tianjin, 300384, P. R. China, E-mail: cwang@ciac.ac.cn

**Table S1** Synthetic details for MCo series (MnCo<sub>2</sub>O<sub>4</sub>). The “instant.” is the abbreviation of “instantaneously”, which means that the 1 mL NaOH solution was added quickly all together.

| Metal salts                                                                                  | Sample No.        | Reaction time/min | n(Mn <sup>2+</sup> )/mmol | n(Co <sup>2+</sup> )/mmol | V(NaOH)/mL; adding manner | n(NaCl)/mmol |
|----------------------------------------------------------------------------------------------|-------------------|-------------------|---------------------------|---------------------------|---------------------------|--------------|
| Mn(OAc) <sub>2</sub> •4H <sub>2</sub> O<br>and/or<br>Co(OAc) <sub>2</sub> •4H <sub>2</sub> O | MCo0              | 30                | 0                         | 0.27                      | 1.0; instant.             | 0            |
|                                                                                              | MCo1              | 30                | 0.09                      | 0.18                      | 1.0; instant.             | 0            |
|                                                                                              | MCo1-T1           | 3                 |                           |                           |                           |              |
|                                                                                              | MCo1-T2           | 5                 |                           |                           |                           |              |
|                                                                                              | MCo1-T3           | 10                |                           |                           |                           |              |
|                                                                                              | MCo1-T4           | 15                |                           |                           |                           |              |
|                                                                                              | MCo1-T5           | 20                |                           |                           |                           |              |
|                                                                                              | MCo1-T6           | 25                |                           |                           |                           |              |
|                                                                                              | MCo2              | 30                | 0.18                      | 0.36                      | 1.0; instant.             | 0            |
|                                                                                              | MCo3              | 30                | 0.045                     | 0.09                      | 1.0; instant.             | 0            |
|                                                                                              | MCo4 <sup>a</sup> | 30                | 0.09                      | 0.18                      | 2.0; instant.             | 0            |
|                                                                                              | MCo5              | 30                | 0.09                      | 0.18                      | 1.0; ~ 176<br>μL/min      | 0            |
|                                                                                              | MCo6              | 30                | 0.09                      | 0.18                      | 1.0; instant.             | 0.54         |
|                                                                                              | MCo7              | 30                | 0.09                      | 0.18                      | 1.0; ~ 176<br>μL/min      | 0.54         |
| MnCl <sub>2</sub> •4H <sub>2</sub> O<br>CoCl <sub>2</sub> •6H <sub>2</sub> O                 | MCo8              | 30                | 0.09                      | 0.18                      | 1.0; instant.             | 0            |
|                                                                                              | MCo9              | 30                | 0.09                      | 0.18                      | 1.0; ~ 176<br>μL/min      | 0            |

<sup>a</sup> The metal salts for MCo4 were dissolved in 8.0 mL UP H<sub>2</sub>O before addition of NaOH solution to keep the total volumes of reacting mixtures same (10 mL) for all products listed here.

**Table S2** Synthetic details for CMn series (CoMn<sub>2</sub>O<sub>4</sub>). The “instant.” is the abbreviation of “instantaneously”, which means that the 1 mL NaOH solution was added quickly all together.

| Metal salts                                                                                  | Sample No.        | Reaction time/min | n(Mn <sup>2+</sup> )/mmol | n(Co <sup>2+</sup> )/mmol | V(NaOH)/mL; adding manner | n(NaCl)/mmol |
|----------------------------------------------------------------------------------------------|-------------------|-------------------|---------------------------|---------------------------|---------------------------|--------------|
| Mn(OAc) <sub>2</sub> •4H <sub>2</sub> O<br>and/or<br>Co(OAc) <sub>2</sub> •4H <sub>2</sub> O | CMn0              | 30                | 0.27                      | 0                         | 1.0; instant.             | 0            |
|                                                                                              | CMn1              | 30                | 0.2                       | 0.067                     | 1.0; instant.             | 0            |
|                                                                                              | CMn1-T1           | 1                 |                           |                           |                           |              |
|                                                                                              | CMn1-T2           | 3                 |                           |                           |                           |              |
|                                                                                              | CMn1-T3           | 5                 |                           |                           |                           |              |
|                                                                                              | CMn1-T4           | 10                |                           |                           |                           |              |
|                                                                                              | CMn1-T5           | 15                |                           |                           |                           |              |
|                                                                                              | CMn1-T6           | 25                |                           |                           |                           |              |
|                                                                                              | CMn2              | 30                | 0.4                       | 0.134                     | 1.0; instant.             | 0            |
|                                                                                              | CMn3              | 30                | 0.1                       | 0.034                     | 1.0; instant.             | 0            |
|                                                                                              | CMn4 <sup>a</sup> | 30                | 0.2                       | 0.067                     | 2.0; instant.             | 0            |
|                                                                                              | CMn5              | 30                | 0.2                       | 0.067                     | 1.0; ~ 86 μL/min          | 0            |
|                                                                                              | CMn6              | 30                | 0.2                       | 0.067                     | 1.0; instant.             | 0.54         |
|                                                                                              | CMn7              | 30                | 0.2                       | 0.067                     | 1.0; ~ 86 μL/min          | 0.54         |
| MnCl <sub>2</sub> •4H <sub>2</sub> O<br>CoCl <sub>2</sub> •6H <sub>2</sub> O                 | CMn8              | 30                | 0.2                       | 0.067                     | 1.0; instant.             | 0            |
|                                                                                              | CMn9              | 30                | 0.2                       | 0.067                     | 1.0; ~ 86 μL/min          | 0            |

<sup>a</sup> The metal salts for CMn4 were dissolved in 8.0 mL UP H<sub>2</sub>O before addition of NaOH solution to keep the total volumes of reacting mixtures same (10 mL) for all products listed here.

**Table S3** The ratios of bivalent and trivalent cations in MCo1, CMn1, 1-MCo1 and 1-CMn calculated by the Lorentzian-Gaussian method. "1-" means the catalysts were collected after 1 run of catalytic reaction. It is clearly that the proportion of bivalent cations, no matter  $\text{Co}^{2+}$  or  $\text{Mn}^{2+}$ , increased after catalysis. M represents Co or Mn.

| Catalysts | Cations          | Total areas of deconvolved peaks | Ratio of $\text{M}^{2+}/\text{M}^{3+}$ | Ratio of Mn/Co |
|-----------|------------------|----------------------------------|----------------------------------------|----------------|
| MCo1      | $\text{Co}^{2+}$ | 11155.402                        | 0.49                                   | 0.41           |
|           | $\text{Co}^{3+}$ | 22555.098                        |                                        |                |
|           | $\text{Mn}^{2+}$ | 8691.533                         | 1.66                                   |                |
|           | $\text{Mn}^{3+}$ | 5249.431                         |                                        |                |
| CMn1      | $\text{Co}^{2+}$ | 5098.727                         | 1.21                                   | 2.26           |
|           | $\text{Co}^{3+}$ | 4230.411                         | 0.77                                   |                |
|           | $\text{Mn}^{2+}$ | 9143.936                         |                                        |                |
|           | $\text{Mn}^{3+}$ | 11928.372                        |                                        |                |
| 1-MCo1    | $\text{Co}^{2+}$ | 20582.446                        | 6.50                                   | 0.50           |
|           | $\text{Co}^{3+}$ | 3166.315                         | 2.38                                   |                |
|           | $\text{Mn}^{2+}$ | 8422.438                         |                                        |                |
|           | $\text{Mn}^{3+}$ | 3538.283                         |                                        |                |
| 1-CMn1    | $\text{Co}^{2+}$ | 4288.505                         | 3.31                                   | 2.88           |
|           | $\text{Co}^{3+}$ | 1294.238                         | 1.72                                   |                |
|           | $\text{Mn}^{2+}$ | 10157.285                        |                                        |                |
|           | $\text{Mn}^{3+}$ | 5901.695                         |                                        |                |

**Table S4** Proportions of different surface oxygen species. The “1- “ means the catalysts were collected after 1 run of catalytic reaction.

| Catalysts | Proportions of oxygen species on the surface |      |                 |      |                          |      |
|-----------|----------------------------------------------|------|-----------------|------|--------------------------|------|
|           | Lattice oxygen                               |      | Adsorbed oxygen |      | Carbonate/Adsorbed water |      |
|           | BE/eV                                        | %    | BE/eV           | %    | BE/eV                    | %    |
| MCo1      | 530.0                                        | 29.8 | 531.4           | 46.2 | 532.4/533.2              | 24.0 |
| 1-MCo1    | 529.6                                        | 25.4 | 531.9           | 63.0 | 533.2                    | 11.6 |
| CMn1      | 529.9                                        | 36.0 | 531.6           | 43.7 | 532.8                    | 20.3 |
| 1-CMn1    | 529.5                                        | 17.3 | 531.6           | 47.7 | 532.9                    | 35.0 |

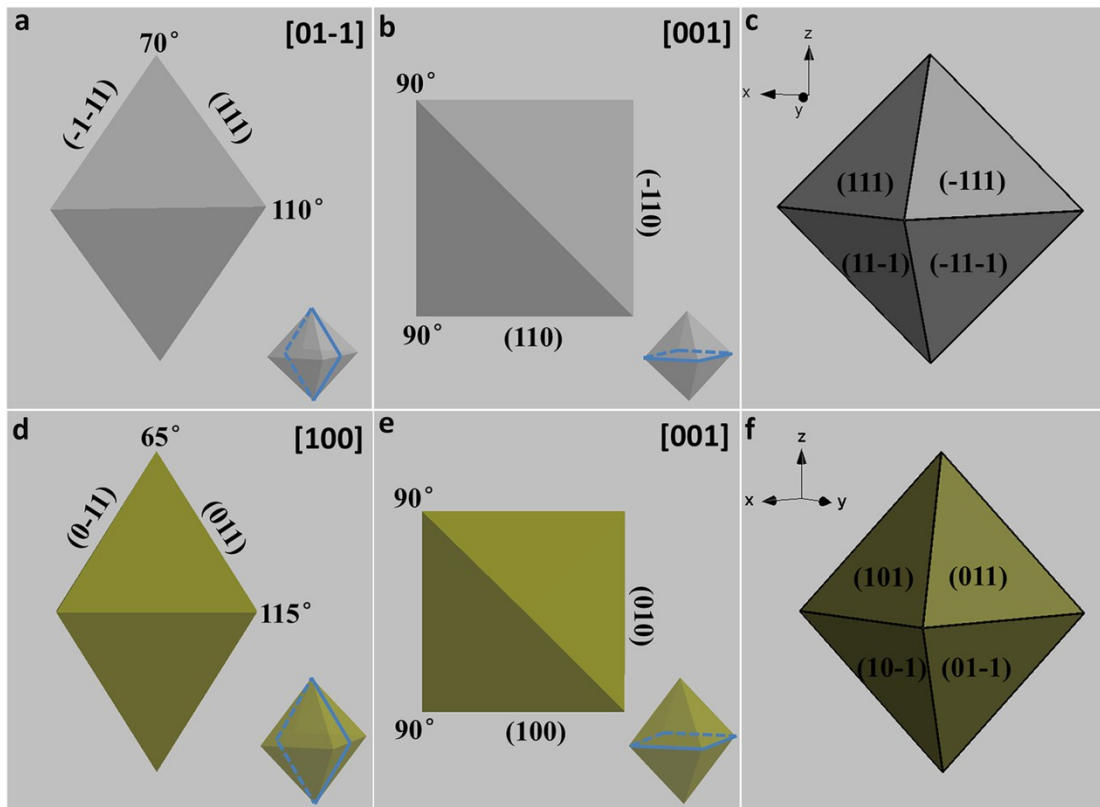

**Fig. S1** (a-c) structural information of MCo1: the exterior forms of the established model along [01-1] direction (a), [001] direction (b) and the Miller indices of the exposed planes from crystal orientation (c). (d-f) structural information of CMn1: exterior forms of the model along [100] direction (d), [001] direction (e) and the Miller indices of the exposed planes from crystal orientation (f). Insets of (a), (b), (d) and (e) display the images (pattern restricted by the blue lines) of corresponding projections along the specific directions in a randomly placed octahedron. The {111} and {101} planes are finally determined for the as-prepared  $\text{MnCo}_2\text{O}_4$  and  $\text{CoMn}_2\text{O}_4$  octahedral crystals, respectively.

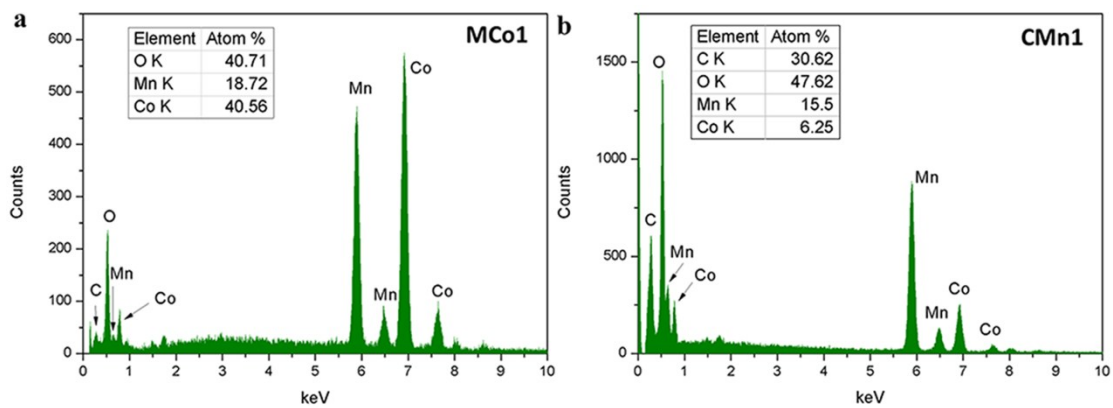

**Fig. S2** EDX spectra of as-prepared MCo1 (a) and CMn1 (b).

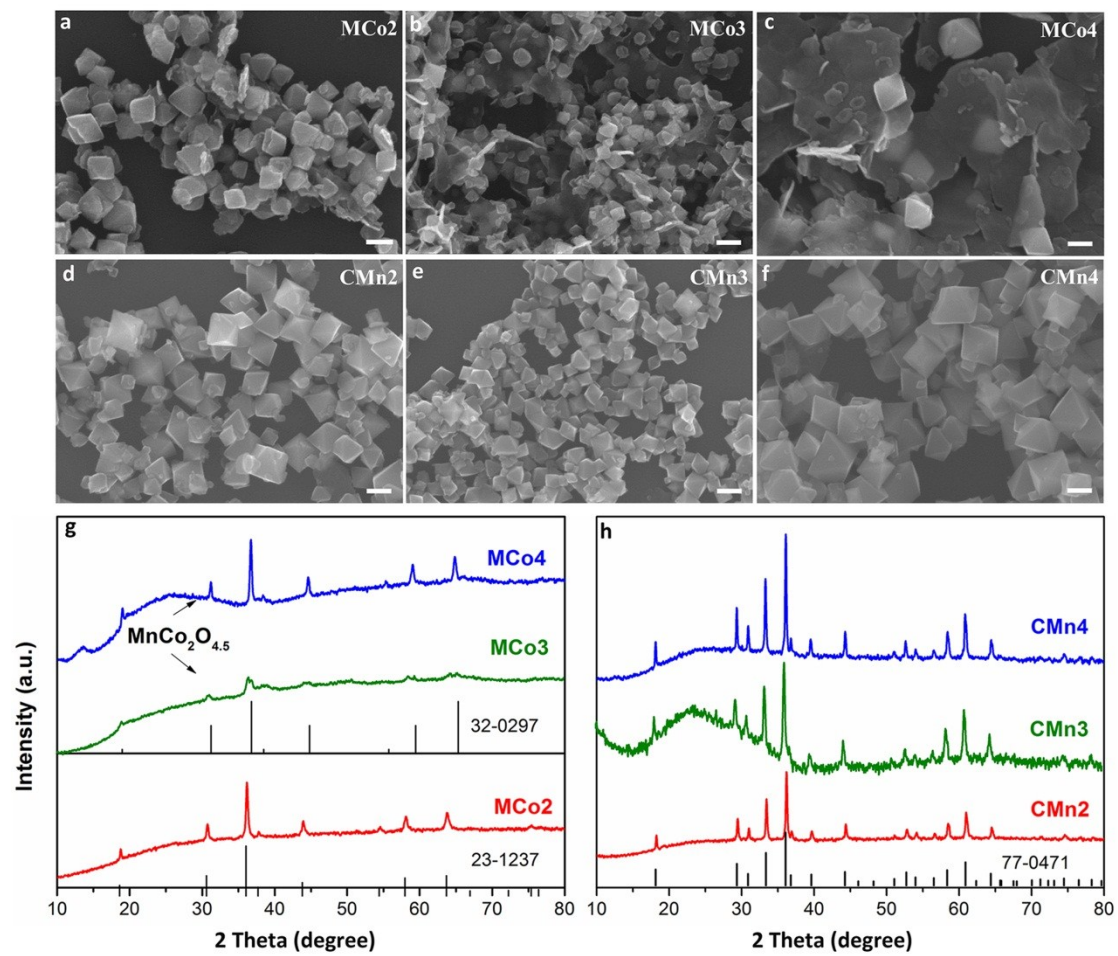

**Fig. S3** SEM and XRD results of MCo<sub>2</sub>-MCo<sub>4</sub> (a-c, g) and CMn<sub>2</sub>-CMn<sub>4</sub> (d-f, h), respectively. The MCo<sub>3</sub> and MCo<sub>4</sub> are indexed to MnCo<sub>2</sub>O<sub>4.5</sub> (JCPDS No. 32-0297) instead of MnCo<sub>2</sub>O<sub>4</sub> (JCPDS No. 23-1237). The scale bar in a-f: 100 nm.

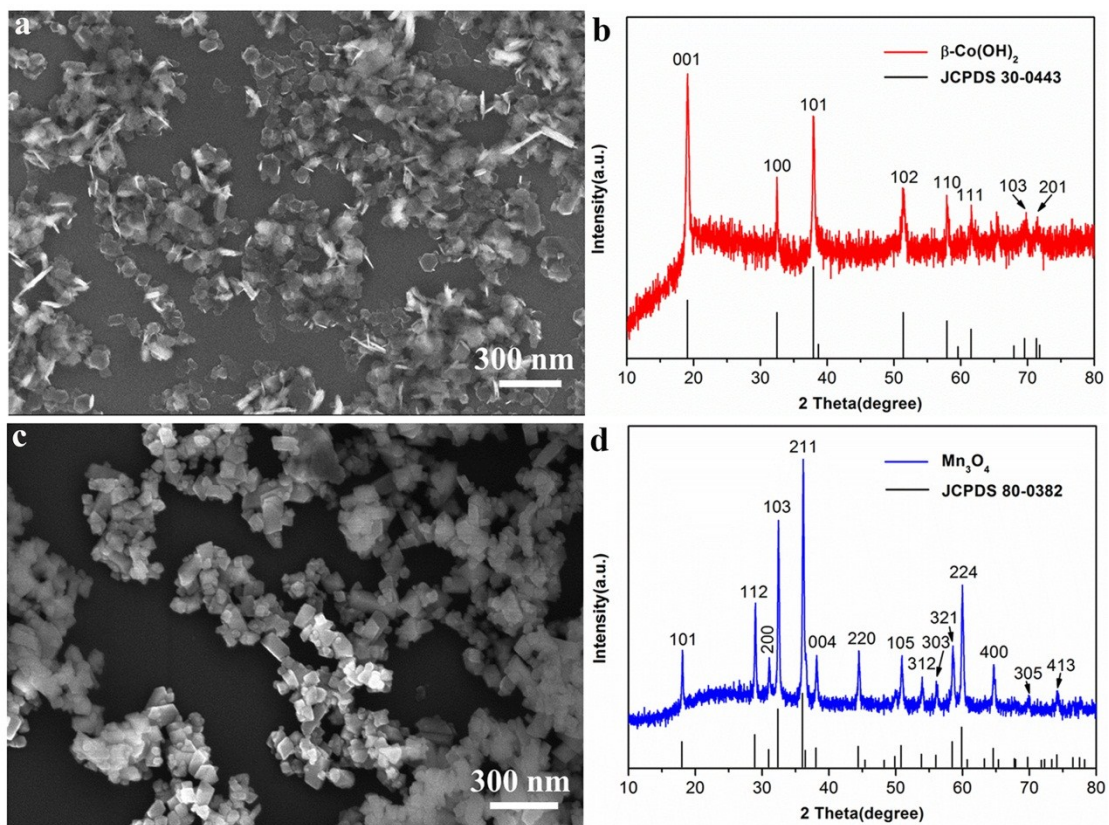

**Fig. S4** SEM images and XRD patterns for the  $\beta\text{-Co(OH)}_2$  (a and b) and  $\text{Mn}_3\text{O}_4$  (c and d) prepared using only one kind of metal salt. It is worth noting that the (001) peak has higher intensity than the (101) peak in Fig. S4b, suggesting a preferred growth along its c-axis for  $\beta\text{-Co(OH)}_2$  (hexagonal crystalline phase) under the present synthetic conditions. Similar phenomena have been also noticed by V. Pralong<sup>1</sup> and Y. L. Hou<sup>2</sup> *et al.*.



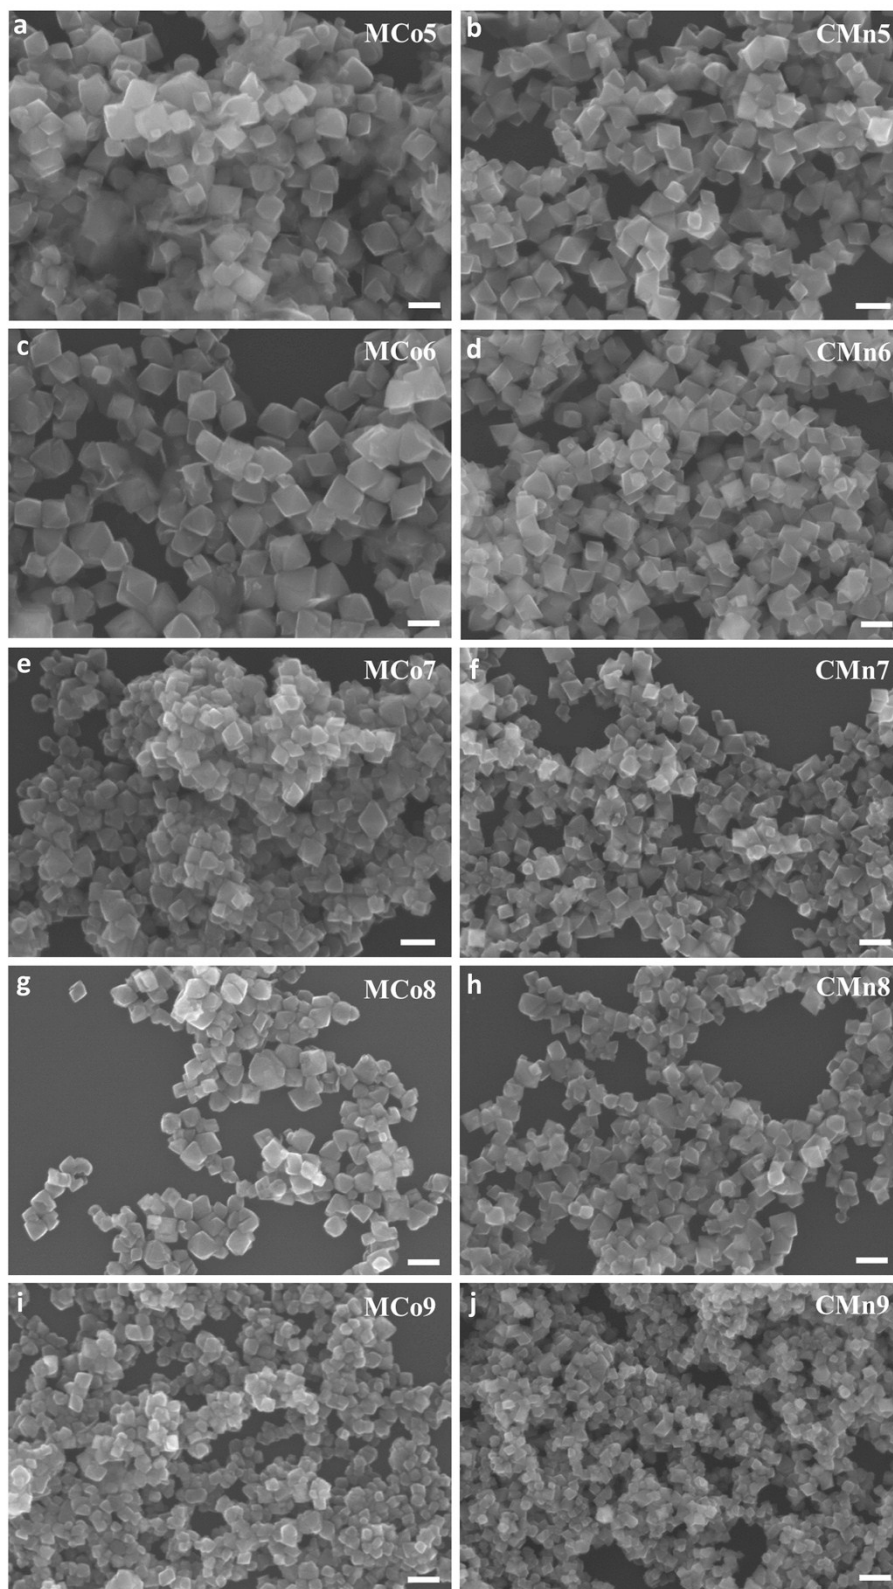

**Fig. S5** SEM images of products MCo5-9 (a, c, e, g, and i) and CMn5-9 (b, d, f, h, and j). The scale bar: 100 nm.

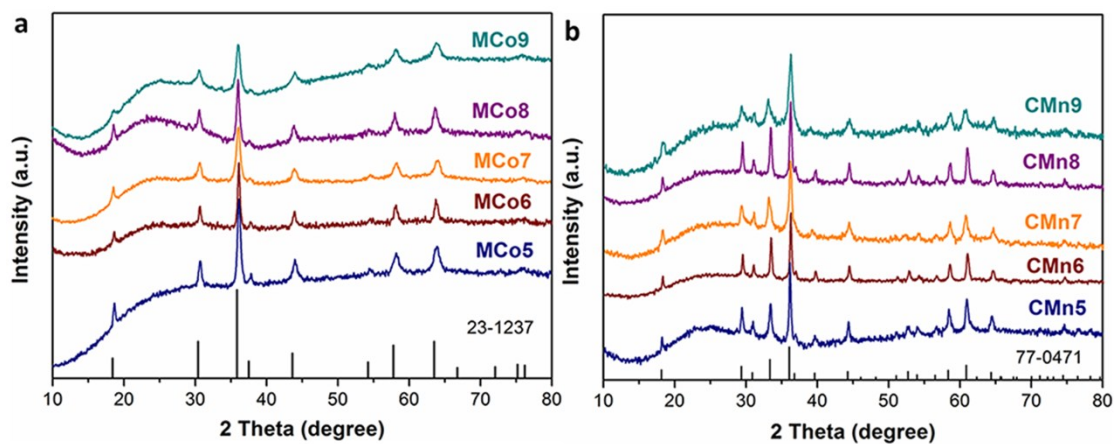

**Fig. S6** XRD patterns of products MCo5-9 (a) and CMn5-9 (b). All patterns show no phase change either for MCo5-9 or for CMn5-9 compared to MCo1 and CMn1, respectively.

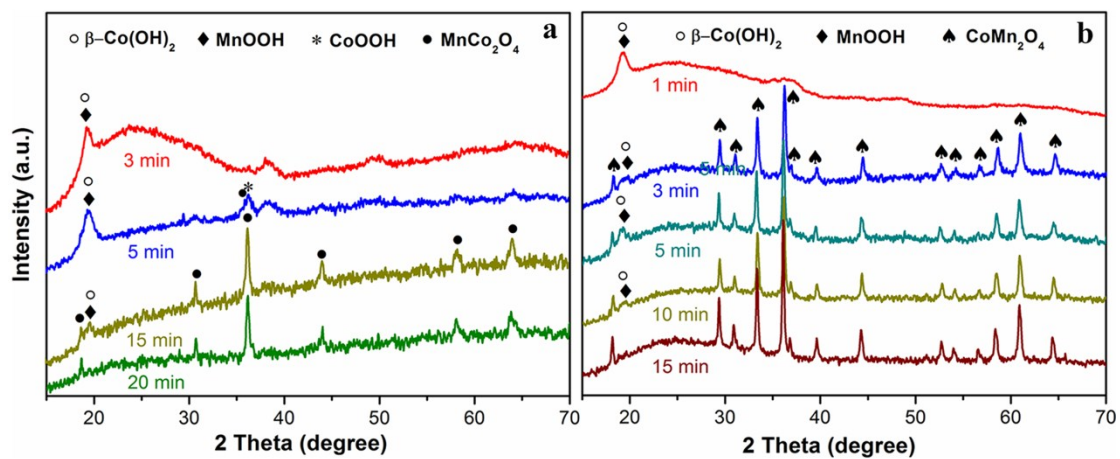

**Fig. S7** XRD patterns of main samples of MCo1-Tx (a, x = 1, 2, 4, 5) and CMn1-Ty (b, y = 1-5) series to study the formation processes of MCo1 and CMn1.

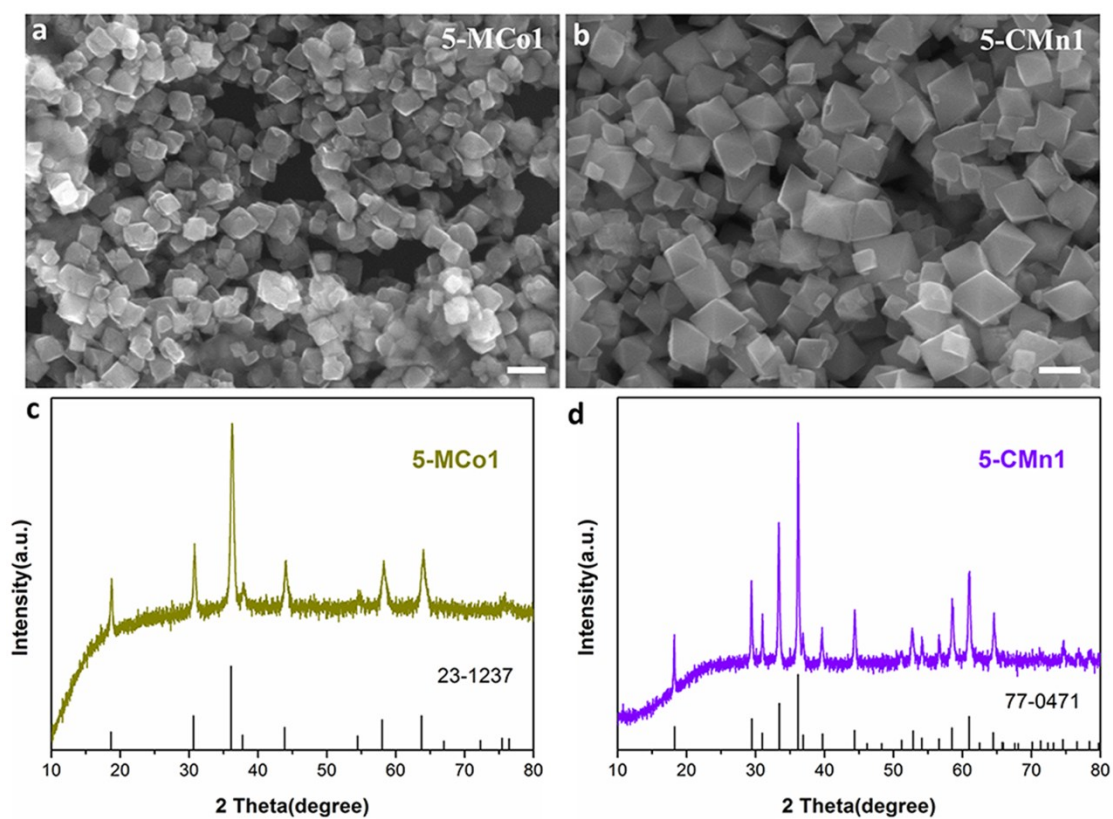

**Fig. S8** SEM images and XRD patterns of 5-MCo1 (a and c) and 5-CMn1 (b and d). “5-” means the catalysts were collected after five runs of catalytic reactions. Scale bar of a and b: 100 nm. No obvious morphological or phase change are observed for these two catalysts.

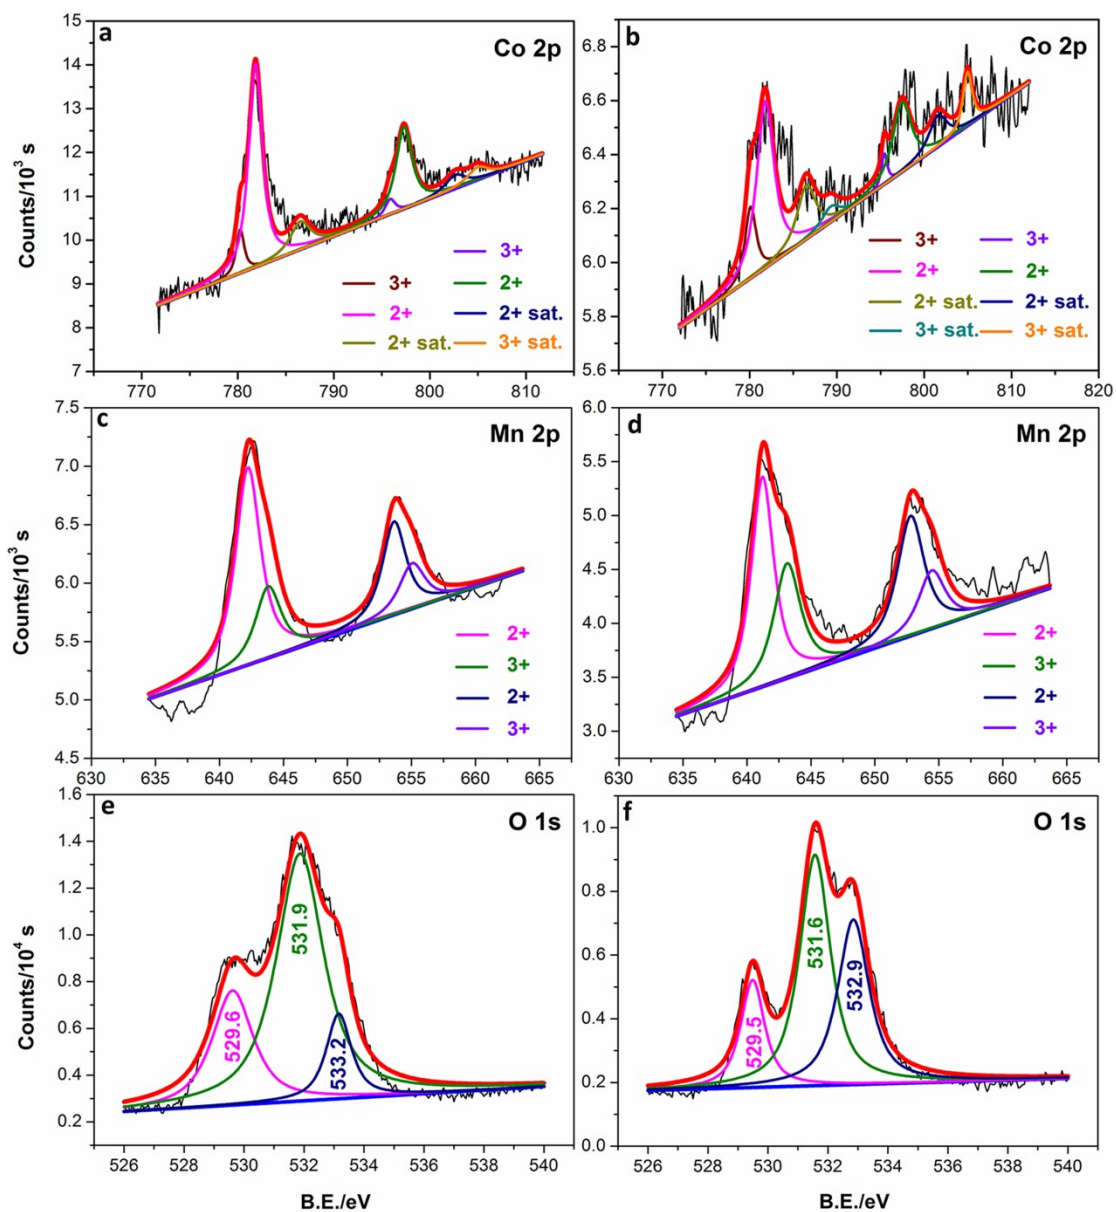

**Fig. S9** XPS spectra of catalysts after 1 run of reaction of Co 2p, Mn 2p and O 1s for 1-MCo (a, c, and e, respectively), and Co 2p, Mn 2p and O 1s for 1-CMn1 (b, d, and f, respectively). "1-" represents the catalysts were collected after the first run of reaction.

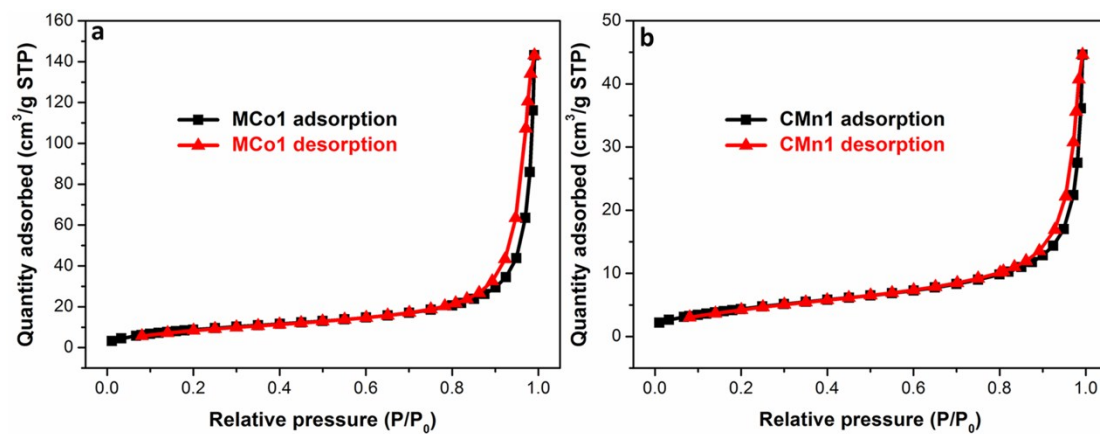

Fig. S10  $N_2$  adsorption-desorption isotherm of MCo1 (a) and CMn1 (b).

## References

- 1 V. Pralong, A. Delahaye-Vidal, B. Beaudoin, B. Gerand and J. M. Tarascon, *J. Mater. Chem.*, 1999, **9**, 955.
- 2 Y. L. Hou, H. Kondoh, M. Shimojo, T. Kogure and T. Ohta, *J. Phys. Chem. B*, 2005, **109**, 19094.
